# Supplementary material for: Microglial Activity in People at Ultra High Risk of Psychosis and in Schizophrenia: An [11C]PBR28 PET Brain Imaging Study
Source: Atypon-hosted journal article supplement (doi:10.1176/appi.ajp.2015.14101358), 2015-10-16
Supplement: appi.ajp.2015.14101358.ds001.pdf [file appi.ajp.2015.14101358.ds001.pdf]

 


Psychiatry Online
